# Supplementary material for: Molecular signatures of neurodegeneration in the cortex of PS1/PS2 double knockout mice
Source: Springer Nature journal article supplement (doi:10.1186/1750-1326-3-14), 2008-01-01
Supplement: Additional file 1 [file 1750-1326-3-14-s1.pdf]

**SUPPLEMENTAL MATERIAL 1. Differences between PS1PS2KO and CNT mice regardless of age or brain region (>50%, p<0.05)**

| Probe Set    | Gene Title                                            | Symbol      | Unigene     | NCBI ID   | allWT | allKO | ALR all | ALR HC | ALR FC | pVal ALL | PrPval HC | PrPval FC |
|--------------|-------------------------------------------------------|-------------|-------------|-----------|-------|-------|---------|--------|--------|----------|-----------|-----------|
| 1417851_at   | chemokine (C-X-C motif) ligand 13                     | Cxcl13      | Mm.10116.1  | AF030636  | 5.13  | 7.43  | 2.31    | 2.02   | 2.59   | 0.00452  | 0.13134   | 0.02250   |
| 1419202_at   | cystatin F (leukocystatin)                            | Cstf        | Mm.12965.1  | NM_009977 | 4.75  | 6.72  | 1.97    | 1.41   | 2.53   | 0.00143  | 0.08791   | 0.00992   |
| 1417266_at   | chemokine (C-C motif) ligand 6                        | Ccl6        | Mm.137.1    | BC002073  | 5.26  | 6.84  | 1.58    | 1.23   | 1.92   | 0.00025  | 0.04007   | 0.00373   |
| 1446181_at   | expressed sequence C85699                             | C85699      | Mm.172989.1 | BG067253  | 4.13  | 5.62  | 1.49    | 1.96   | 1.01   | 0.01975  | 0.13849   | 0.06535   |
| 1420699_at   | C-type lectin domain family 7, member a               | Clec7a      | Mm.132943.1 | NM_020008 | 5.08  | 6.56  | 1.47    | 1.20   | 1.75   | 0.00100  | 0.06092   | 0.01402   |
| 1426509_s_at | glial fibrillary acidic protein                       | Gfap        | Mm.1239.1   | BB183081  | 8.93  | 10.36 | 1.43    | 1.13   | 1.73   | 0.00124  | 0.04247   | 0.02356   |
| 1418021_at   | complement component 4B                               | C4b         | Mm.16106.1  | NM_009780 | 8.13  | 9.47  | 1.34    | 1.07   | 1.61   | 0.00507  | 0.11087   | 0.03941   |
| 1450792_at   | TYRO protein tyrosine kinase binding protein          | Tyrbp       | Mm.46301.1  | NM_011662 | 7.77  | 9.11  | 1.34    | 1.13   | 1.56   | 0.00088  | 0.06521   | 0.01056   |
| 1426508_at   | glial fibrillary acidic protein                       | Gfap        | Mm.1239.1   | BB183081  | 9.28  | 10.60 | 1.32    | 0.98   | 1.67   | 0.00260  | 0.05941   | 0.03135   |
| 1448859_at   | chemokine (C-X-C motif) ligand 13                     | Cxcl13      | Mm.10116.1  | AF030636  | 6.10  | 7.41  | 1.32    | 1.07   | 1.56   | 0.00426  | 0.13192   | 0.02315   |
| 1436996_x_at | lysozyme                                              | Lyz         | Mm.45436.2  | AV066625  | 6.72  | 7.88  | 1.16    | 0.79   | 1.54   | 0.00803  | 0.15150   | 0.03980   |
| 1423547_at   | lysozyme                                              | Lyzs        | Mm.45436.1  | AW208566  | 7.05  | 8.16  | 1.11    | 0.71   | 1.51   | 0.00851  | 0.12182   | 0.04666   |
| 1417381_at   | complement component 1, q subcomponent, alpha         | C1qa        | Mm.370.1    | NM_007572 | 8.73  | 9.84  | 1.11    | 0.94   | 1.28   | 0.00180  | 0.09314   | 0.01369   |
| 1439426_x_at | lysozyme                                              | Lyz         | Mm.45436.3  | AV058500  | 4.69  | 5.75  | 1.06    | 0.74   | 1.37   | 0.00311  | 0.07813   | 0.02788   |
| 1449164_at   | CD68 antigen                                          | Cd68        | Mm.15819.1  | BC021637  | 6.28  | 7.31  | 1.03    | 0.85   | 1.22   | 0.00342  | 0.09923   | 0.02970   |
| 1419128_at   | integrin alpha X                                      | Itgax       | Mm.22378.1  | NM_021334 | 5.02  | 6.02  | 1.00    | 0.57   | 1.43   | 0.00244  | 0.12644   | 0.00716   |
| 1460218_at   | CD52 antigen                                          | Cd52        | Mm.24130.1  | NM_013706 | 5.62  | 6.61  | 0.99    | 0.81   | 1.16   | 0.00108  | 0.07929   | 0.00912   |
| 1417063_at   | complement component 1, q subcomponent, beta          | C1qb        | Mm.2570.1   | NM_009777 | 8.45  | 9.41  | 0.97    | 0.84   | 1.10   | 0.00297  | 0.10032   | 0.02402   |
| 1437726_x_at | complement component 1, q subcomponent, beta          | C1qb        | Mm.2570.3   | BB111335  | 5.79  | 6.75  | 0.96    | 0.94   | 0.98   | 0.00025  | 0.02432   | 0.01219   |
| 1452968_at   | collagen triple helix repeat containing 1             | Cthrc1      | Mm.41556.1  | AK003674  | 5.37  | 6.33  | 0.96    | 1.00   | 0.92   | 0.00030  | 0.02034   | 0.04006   |
| 1425519_a_at | CD74 antigen (invariant polypeptide of MHC class II ) | Cd74        | Mm.7043.1   | BC003476  | 6.49  | 7.44  | 0.95    | 0.69   | 1.21   | 0.00850  | 0.16952   | 0.03817   |
| 1421792_s_at | triggering receptor expressed on myeloid cells 2      | Trem2       | Mm.195828.1 | NM_031254 | 6.61  | 7.54  | 0.93    | 0.66   | 1.20   | 0.00288  | 0.12005   | 0.01573   |
| 1427076_at   | macrophage expressed gene 1                           | Mpeg1       | Mm.3999.1   | L20315    | 7.17  | 8.10  | 0.93    | 0.85   | 1.01   | 0.00038  | 0.03121   | 0.01347   |
| 1449401_at   | complement component 1, q subcomponent, C             | C1qc        | Mm.3453.1   | NM_007574 | 8.45  | 9.38  | 0.93    | 0.79   | 1.07   | 0.00185  | 0.07523   | 0.02206   |
| 1449911_at   | lymphocyte-activation gene 3                          | Lag3        | Mm.4528.1   | NM_008479 | 5.71  | 6.62  | 0.91    | 0.59   | 1.24   | 0.00267  | 0.12388   | 0.01152   |
| 1433935_at   | expressed sequence AU020206                           | AU020206    | Mm.200422.1 | B1151331  | 5.24  | 6.14  | 0.90    | 0.74   | 1.05   | 0.00219  | 0.06900   | 0.02895   |
| 1429846_at   | RIKEN cDNA 9030411K21 gene                            | 9030411K21R | Mm.100469.1 | BM250766  | 4.19  | 5.08  | 0.89    | 1.03   | 0.76   | 0.00464  | 0.02851   | 0.15935   |
| 1422903_at   | lymphocyte antigen 86                                 | Ly86        | Mm.2639.1   | NM_010745 | 7.44  | 8.31  | 0.87    | 0.60   | 1.13   | 0.00215  | 0.09559   | 0.01465   |
| 1417868_a_at | cathepsin Z                                           | Ctsz        | Mm.156919.1 | NM_022325 | 7.44  | 8.30  | 0.86    | 0.81   | 0.90   | 0.00256  | 0.08309   | 0.02592   |
| 1440807_at   | Membrane associated guanylate kinase 2                | Magi2       | Mm.132480.1 | BB337886  | 4.17  | 5.03  | 0.86    | 1.05   | 0.66   | 0.03780  | 0.02008   | 0.40748   |
| 1451780_at   | B-cell linker                                         | Blink       | Mm.9749.1   | AF068182  | 6.66  | 7.50  | 0.85    | 0.81   | 0.89   | 0.00379  | 0.08357   | 0.04229   |
| 1419483_at   | complement component 3a receptor 1                    | C3ar1       | Mm.2408.1   | NM_009779 | 5.32  | 6.14  | 0.82    | 0.66   | 0.98   | 0.00251  | 0.05516   | 0.03805   |
| 1417870_x_at | cathepsin Z                                           | Ctsz        | Mm.156919.1 | NM_022325 | 7.84  | 8.65  | 0.81    | 0.70   | 0.92   | 0.00369  | 0.11343   | 0.02486   |
| 1434819_at   | beta galactoside alpha 2,6 sialyltransferase 2        | St6gal2     | Mm.83662.1  | BB709312  | 6.17  | 6.98  | 0.81    | 1.17   | 0.45   | 0.03765  | 0.15352   | 0.06530   |
| 1457797_at   | expressed sequence AI605517                           | AI605517    | Mm.37805.1  | AV340788  | 6.70  | 7.51  | 0.81    | 0.79   | 0.82   | 0.04990  | 0.24921   | 0.24132   |
| 1445111_at   | ---                                                   | AW548720    | Mm.215518.1 | AW548720  | 4.69  | 5.49  | 0.80    | 0.92   | 0.68   | 0.01468  | 0.12396   | 0.15998   |
| 1427351_s_at | immunoglobulin heavy chain 6 (heavy chain of IgM)     | Igh-6       | Mm.218842.1 | BB226392  | 7.32  | 8.12  | 0.80    | 0.85   | 0.74   | 0.01885  | 0.14780   | 0.10140   |
| 1435290_x_at | histocompatibility 2, class II antigen A, alpha       | H2-Aa       | Mm.175310.2 | BE688749  | 5.98  | 6.75  | 0.78    | 0.54   | 1.01   | 0.02613  | 0.33849   | 0.03616   |
| 1430096_at   | RIKEN cDNA 2900017F05 gene                            | 2900017F05R | Mm.17681.1  | AK013544  | 5.28  | 6.05  | 0.78    | 1.23   | 0.32   | 0.03778  | 0.06260   | 0.34964   |
| 1416066_at   | CD9 antigen                                           | Cd9         | Mm.2956.1   | NM_007657 | 8.45  | 9.22  | 0.77    | 0.67   | 0.87   | 0.00160  | 0.06631   | 0.02275   |
| 1438200_at   | sulfatase 1                                           | Sulf1       | Mm.45563.1  | BB065799  | 6.33  | 7.08  | 0.75    | 1.24   | 0.26   | 0.02865  | 0.01863   | 0.28295   |
| 1416382_at   | cathepsin C                                           | Ctsc        | Mm.684.1    | NM_009982 | 6.44  | 7.17  | 0.73    | 0.56   | 0.90   | 0.00157  | 0.05315   | 0.02338   |
| 1442241_at   | Serine/arginine-rich protein specific kinase 2        | Srpk2       | Mm.82655.1  | BE979921  | 6.19  | 6.90  | 0.71    | 0.82   | 0.61   | 0.01075  | 0.11007   | 0.13599   |
| 1436905_x_at | lysosomal-associated protein transmembrane 5          | Laptm5      | Mm.4554.2   | BB218107  | 5.76  | 6.48  | 0.71    | 0.69   | 0.73   | 0.00014  | 0.01123   | 0.01530   |
| 1428114_at   | solute carrier family 14 (urea transporter), member 1 | Slc14a1     | Mm.33832.1  | AW556396  | 6.06  | 6.76  | 0.71    | 0.44   | 0.98   | 0.00222  | 0.08049   | 0.01390   |
| 1422124_a_at | protein tyrosine phosphatase, receptor type, C        | Ptprc       | Mm.143846.1 | NM_011210 | 4.94  | 5.65  | 0.71    | 0.61   | 0.81   | 0.00493  | 0.04972   | 0.07405   |
| 1448591_at   | cathepsin S                                           | Ctss        | Mm.3619.1   | NM_021281 | 9.00  | 9.70  | 0.70    | 0.50   | 0.90   | 0.00214  | 0.12149   | 0.00945   |
| 1454268_a_at | cytochrome b-245, alpha polypeptide                   | Cyba        | Mm.448.2    | AK018713  | 6.32  | 7.02  | 0.70    | 0.43   | 0.96   | 0.00208  | 0.06983   | 0.01453   |
| 1417869_s_at | cathepsin Z                                           | Ctsz        | Mm.156919.1 | NM_022325 | 5.76  | 6.46  | 0.70    | 0.64   | 0.76   | 0.00157  | 0.04719   | 0.03422   |

Suppl Mat 1 - allKO vs allCNT Table.xls

|              |                                                          |             |             |           |       |       |       |       |       |         |         |         |
|--------------|----------------------------------------------------------|-------------|-------------|-----------|-------|-------|-------|-------|-------|---------|---------|---------|
| 1453620_at   | cortactin binding protein 2                              | Cttnbp2     | Mm.133159.1 | AW488544  | 7.67  | 8.36  | 0.69  | 0.81  | 0.57  | 0.02683 | 0.14380 | 0.23360 |
| 1416714_at   | interferon regulatory factor 8                           | Irf8        | Mm.3182.1   | BG069095  | 5.45  | 6.14  | 0.69  | 0.44  | 0.94  | 0.00365 | 0.10040 | 0.02244 |
| 1434366_x_at | complement component 1, q subcomponent, beta             | C1qb        | Mm.2570.2   | AW227993  | 6.71  | 7.40  | 0.69  | 0.60  | 0.78  | 0.00113 | 0.03548 | 0.03044 |
| 1429135_at   | RIKEN cDNA 1110059M19 gene                               | 1110059M19R | Mm.23496.1  | AV015858  | 5.41  | 6.09  | 0.69  | 1.03  | 0.34  | 0.02029 | 0.03778 | 0.25963 |
| 1436107_at   | LSM8 homolog, U6 small nuclear RNA associated            | Lsm8        | Mm.133137.1 | AV167707  | 5.03  | 5.71  | 0.68  | 0.79  | 0.57  | 0.04282 | 0.21509 | 0.23001 |
| 1420697_at   | solute carrier family 15, member 3                       | Slc15a3     | Mm.218870.1 | NM_023044 | 4.39  | 5.07  | 0.68  | 0.49  | 0.87  | 0.00648 | 0.04774 | 0.06500 |
| 1446772_at   | ---                                                      | BB453864    | Mm.215970.1 | BB453864  | 4.12  | 4.79  | 0.67  | 0.87  | 0.47  | 0.00352 | 0.01143 | 0.12967 |
| 1437874_s_at | hexosaminidase B                                         | Hexb        | Mm.219675.2 | AV225808  | 8.62  | 9.29  | 0.67  | 0.58  | 0.75  | 0.00171 | 0.07442 | 0.02038 |
| 1426808_at   | lectin, galactose binding, soluble 3                     | Lgals3      | Mm.2970.1   | X16834    | 4.99  | 5.65  | 0.66  | 0.48  | 0.83  | 0.00605 | 0.00033 | 0.08579 |
| 1419004_s_at | B-cell leukemia/lymphoma 2 related protein A1            | Bcl2a1      | Mm.196731.1 | L16462    | 5.69  | 6.34  | 0.65  | 0.45  | 0.86  | 0.00561 | 0.08845 | 0.04303 |
| 1419132_at   | toll-like receptor 2                                     | Tlr2        | Mm.87596.1  | NM_011905 | 5.11  | 5.76  | 0.65  | 0.42  | 0.89  | 0.00867 | 0.11926 | 0.04823 |
| 1418340_at   | Fc receptor, IgE, high affinity I, gamma polypeptide     | Fcer1g      | Mm.22673.1  | NM_010185 | 6.88  | 7.52  | 0.65  | 0.47  | 0.82  | 0.00215 | 0.07978 | 0.02018 |
| 1448118_a_at | cathepsin D                                              | Ctsd        | Mm.2147.1   | NM_009883 | 10.56 | 11.20 | 0.64  | 0.60  | 0.69  | 0.00147 | 0.05952 | 0.02417 |
| 1427329_a_at | immunoglobulin heavy chain 6 (heavy chain of IgM)        | Igh-6       | Mm.28362.2  | A1326478  | 5.94  | 6.58  | 0.64  | 0.65  | 0.62  | 0.01051 | 0.12194 | 0.07176 |
| 1440637_at   | Intersectin 1 (SH3 domain protein 1A)                    | Itns1       | Mm.103075.1 | BG074656  | 6.12  | 6.76  | 0.63  | 0.75  | 0.52  | 0.01805 | 0.11570 | 0.20112 |
| 1450678_at   | integrin beta 2                                          | Itgb2       | Mm.1137.1   | NM_008404 | 5.90  | 6.53  | 0.63  | 0.44  | 0.82  | 0.00512 | 0.13998 | 0.02652 |
| 1456440_s_at | ST8 a-N-acetyl-neuraminide alpha-2,8-sialyltransf 6      | St8sia6     | Mm.24267.2  | AV375081  | 5.33  | 5.96  | 0.63  | 0.72  | 0.53  | 0.02041 | 0.00816 | 0.31737 |
| 1456655_at   | 16 days neonate cerebellum cDNA                          | BM231698    | Mm.69077.1  | BM231698  | 6.96  | 7.57  | 0.62  | 0.68  | 0.56  | 0.01113 | 0.06220 | 0.20169 |
| 1448748_at   | pleckstrin                                               | Plek        | Mm.98232.1  | AF181829  | 6.29  | 6.90  | 0.61  | 0.54  | 0.69  | 0.00499 | 0.08747 | 0.05320 |
| 1418365_at   | cathepsin H                                              | Ctsh        | Mm.2277.1   | NM_007801 | 6.45  | 7.06  | 0.61  | 0.52  | 0.71  | 0.00174 | 0.02609 | 0.04492 |
| 1417268_at   | CD14 antigen                                             | Cd14        | Mm.3460.1   | NM_009841 | 5.83  | 6.43  | 0.61  | 0.40  | 0.81  | 0.00008 | 0.01818 | 0.00027 |
| 1419482_at   | complement component 3a receptor 1                       | C3ar1       | Mm.2408.1   | NM_009779 | 5.31  | 5.91  | 0.60  | 0.28  | 0.91  | 0.02177 | 0.34027 | 0.03940 |
| 1418989_at   | cathepsin E                                              | Ctse        | Mm.33671.1  | NM_007799 | 4.96  | 5.55  | 0.59  | 0.30  | 0.89  | 0.04693 | 0.37190 | 0.09581 |
| 1450249_s_at | kinesin family member 5                                  | Kif5        | Mm.30355.1  | NM_008447 | 9.84  | 9.26  | -0.59 | -0.74 | -0.43 | 0.00679 | 0.07550 | 0.02867 |
| 1430144_at   | RIKEN cDNA 5830411G16 gene                               | 5830411G16R | Mm.105343.1 | BB815600  | 5.84  | 5.25  | -0.59 | -0.73 | -0.45 | 0.00053 | 0.01204 | 0.00490 |
| 1445061_at   | Protocadherin 9                                          | Pcdh9       | Mm.155985.1 | BM941356  | 5.38  | 4.78  | -0.59 | -0.74 | -0.45 | 0.00315 | 0.02633 | 0.10991 |
| 1445631_at   | ---                                                      | BE865226    | Mm.156043.1 | BE865226  | 7.89  | 7.29  | -0.60 | -0.99 | -0.22 | 0.02380 | 0.01433 | 0.20587 |
| 1445081_at   | RIKEN cDNA A930041I02 gene                               | A930041I02R | Mm.204836.1 | BB335888  | 4.92  | 4.31  | -0.61 | -0.82 | -0.40 | 0.04799 | 0.09968 | 0.41230 |
| 1428484_at   | oxysterol binding protein-like 3                         | Osbp13      | Mm.31024.1  | AK004768  | 7.69  | 7.08  | -0.61 | -0.75 | -0.47 | 0.02787 | 0.11734 | 0.27315 |
| 1430597_at   | janus kinase and microtubule interacting protein 1       | Jakmp1      | Mm.159667.1 | BB206614  | 6.40  | 5.78  | -0.61 | -0.77 | -0.45 | 0.01141 | 0.07705 | 0.16765 |
| 1457142_at   | EF hand calcium binding protein 1                        | Efcbb1      | Mm.131089.1 | BB667731  | 6.88  | 6.26  | -0.61 | -0.99 | -0.23 | 0.01915 | 0.01058 | 0.11194 |
| 1440318_at   | WD repeat domain 35                                      | Wdr35       | Mm.131476.1 | BB475816  | 6.73  | 6.12  | -0.62 | -0.96 | -0.27 | 0.02358 | 0.04541 | 0.20028 |
| 1458314_at   | Solute carrier family 1 (glial-glutamate transporter), 2 | Slc1a2      | Mm.101872.1 | AW491006  | 5.17  | 4.55  | -0.62 | -0.31 | -0.93 | 0.02922 | 0.20100 | 0.08620 |
| 1443597_at   | cofactor required for Sp1 transcriptional activation 2   | Crsp2       | Mm.187323.1 | BB463128  | 5.88  | 5.27  | -0.62 | -0.94 | -0.30 | 0.01610 | 0.01351 | 0.25133 |
| 1447513_at   | potassium voltage-gated channel, Shal, member 3          | Kcnd3       | Mm.54226.1  | BE957136  | 5.42  | 4.80  | -0.62 | -0.98 | -0.26 | 0.02069 | 0.02902 | 0.17797 |
| 1459826_at   | Potassium voltage-gated channel, subfamily Q, 2          | Kcng2       | Mm.131914.1 | BB264132  | 6.53  | 5.91  | -0.62 | -1.00 | -0.24 | 0.02561 | 0.03962 | 0.11719 |
| 1457756_at   | zinc finger protein 192                                  | Zfp192      | Mm.151515.1 | BB483373  | 5.15  | 4.53  | -0.62 | -0.70 | -0.54 | 0.00573 | 0.11085 | 0.05755 |
| 1429517_at   | zinc finger, FYVE domain containing 20                   | Zfyve20     | Mm.26129.1  | BC017622  | 5.66  | 5.04  | -0.63 | -0.87 | -0.38 | 0.00844 | 0.00014 | 0.23081 |
| 1431371_at   | RIKEN cDNA 9030411M13 gene                               | 9030411M13R | Mm.97440.1  | BQ228391  | 5.19  | 4.56  | -0.63 | -0.75 | -0.51 | 0.00613 | 0.08545 | 0.08782 |
| 1431196_at   | ATPase, Ca++-sequestering                                | Atp2c1      | Mm.153302.1 | BG296252  | 7.44  | 6.80  | -0.64 | -1.11 | -0.18 | 0.03415 | 0.01496 | 0.20644 |
| 1452418_at   | RIKEN cDNA 1200016E24 gene                               | 1200016E24R | Mm.171545.1 | BF719154  | 8.44  | 7.79  | -0.65 | -0.70 | -0.59 | 0.00925 | 0.07114 | 0.11799 |
| 1455960_at   | multiple EGF-like-domains 9                              | Megf9       | Mm.28686.3  | BB483642  | 7.16  | 6.51  | -0.66 | -1.06 | -0.26 | 0.02330 | 0.03328 | 0.10127 |
| 1417432_a_at | guanine nucleotide binding protein, beta 1               | Gnb1        | Mm.2344.1   | NM_008142 | 9.30  | 8.64  | -0.66 | -0.63 | -0.69 | 0.00689 | 0.09981 | 0.06402 |
| 1445473_at   | DIRAS family, GTP-binding RAS-like 2                     | Diras2      | Mm.123719.1 | BB229114  | 8.68  | 8.01  | -0.67 | -0.91 | -0.43 | 0.01493 | 0.04776 | 0.24360 |
| 1459317_at   | ankyrin 2, brain                                         | Ank2        | Mm.208496.1 | BB280924  | 6.36  | 5.68  | -0.68 | -0.81 | -0.54 | 0.00157 | 0.03391 | 0.05471 |
| 1435770_at   | thioredoxin domain containing 13                         | Txndc13     | Mm.44400.1  | BB215068  | 8.05  | 7.37  | -0.68 | -1.14 | -0.22 | 0.03786 | 0.04575 | 0.26496 |
| 1444139_at   | DNA-damage-inducible transcript 4-like                   | Ddit4l      | Mm.205420.1 | BG797099  | 7.15  | 6.47  | -0.68 | -0.60 | -0.76 | 0.00392 | 0.03772 | 0.10333 |
| 1418610_at   | solute carrier family 17, member 6                       | Slc17a6     | Mm.70945.1  | NM_080853 | 6.52  | 5.84  | -0.68 | -0.78 | -0.59 | 0.00014 | 0.01017 | 0.01269 |
| 1447222_at   | heat shock protein 12A                                   | Hspa12a     | Mm.86619.1  | A1854582  | 7.00  | 6.31  | -0.68 | -1.11 | -0.25 | 0.01935 | 0.01092 | 0.05581 |
| 1456827_at   | expressed sequence AA987161                              | AA987161    | Mm.138283.1 | BB131790  | 5.13  | 4.45  | -0.68 | -0.95 | -0.42 | 0.00508 | 0.02914 | 0.04150 |
| 1437257_at   | WD repeat domain 47                                      | Wdr47       | Mm.125895.1 | BB344753  | 7.67  | 6.97  | -0.70 | -1.15 | -0.24 | 0.04503 | 0.08890 | 0.05026 |
| 1444141_at   | sorting nexin 13                                         | Snx13       | Mm.213991.1 | BB828008  | 5.53  | 4.83  | -0.71 | -1.11 | -0.30 | 0.04571 | 0.11210 | 0.21738 |

Suppl Mat 1 - allKO vs allCNT Table.xls

|              |                                                 |             |             |          |              |              |              |              |              |         |         |         |
|--------------|-------------------------------------------------|-------------|-------------|----------|--------------|--------------|--------------|--------------|--------------|---------|---------|---------|
| 1439517_at   | myb-like, SWIRM and MPN domains 1               | Mysm1       | Mm.202463.1 | BB660695 | <b>6.16</b>  | <b>5.42</b>  | <b>-0.74</b> | <b>-1.05</b> | <b>-0.43</b> | 0.00762 | 0.03639 | 0.04338 |
| 1454696_at   | guanine nucleotide binding protein, beta 1      | Gnb1        | Mm.200776.1 | BG071068 | <b>11.05</b> | <b>10.31</b> | <b>-0.75</b> | <b>-0.52</b> | <b>-0.97</b> | 0.00583 | 0.06708 | 0.05214 |
| 1453787_at   | thioredoxin domain containing 13                | Txndc13     | Mm.156901.1 | AK015667 | <b>8.39</b>  | <b>7.61</b>  | <b>-0.78</b> | <b>-1.27</b> | <b>-0.28</b> | 0.02433 | 0.02602 | 0.07444 |
| 1431254_at   | kelch repeat and BTB (POZ) domain containing 11 | Kbtbd11     | Mm.153428.1 | BG807055 | <b>6.93</b>  | <b>6.15</b>  | <b>-0.78</b> | <b>-0.97</b> | <b>-0.59</b> | 0.01026 | 0.07136 | 0.16856 |
| 1446652_at   | RALBP1 associated protein 2                     | Reps2       | Mm.151793.1 | BB547008 | <b>6.67</b>  | <b>5.88</b>  | <b>-0.79</b> | <b>-1.08</b> | <b>-0.50</b> | 0.00899 | 0.07116 | 0.02248 |
| 1444298_at   | RIKEN cDNA A130090K04 gene                      | A130090K04R | Mm.122667.1 | BB703415 | <b>6.60</b>  | <b>5.81</b>  | <b>-0.79</b> | <b>-1.06</b> | <b>-0.52</b> | 0.01443 | 0.07289 | 0.18248 |
| 1459430_at   | G protein-coupled receptor 158                  | Gpr158      | Mm.209128.1 | BB429778 | <b>7.42</b>  | <b>6.62</b>  | <b>-0.81</b> | <b>-1.10</b> | <b>-0.51</b> | 0.00407 | 0.00783 | 0.10519 |
| 1444001_at   | RIKEN cDNA C230082I21R gene                     | C230082I21R | Mm.39545.1  | AW488249 | <b>8.99</b>  | <b>8.05</b>  | <b>-0.94</b> | <b>-1.48</b> | <b>-0.40</b> | 0.02240 | 0.04672 | 0.06925 |
| 1432646_a_at | predicted gene, EG667653                        | EG667653    | Mm.15985.3  | BE859789 | <b>8.89</b>  | <b>7.91</b>  | <b>-0.97</b> | <b>-1.48</b> | <b>-0.47</b> | 0.01130 | 0.05039 | 0.00798 |
| 1431214_at   | hypothetical gene LOC433762                     | LOC433762   | Mm.157900.1 | BG297038 | <b>8.49</b>  | <b>7.46</b>  | <b>-1.03</b> | <b>-1.13</b> | <b>-0.93</b> | 0.00466 | 0.07314 | 0.05397 |
| 1456911_at   | CLIP associating protein 2                      | Clasp2      | Mm.214961.1 | BB831639 | <b>7.42</b>  | <b>6.30</b>  | <b>-1.13</b> | <b>-1.25</b> | <b>-1.00</b> | 0.03548 | 0.15935 | 0.26848 |
| 1431213_a_at | hypothetical gene LOC433762                     | LOC433762   | Mm.157900.1 | BG297038 | <b>9.44</b>  | <b>8.27</b>  | <b>-1.17</b> | <b>-1.38</b> | <b>-0.96</b> | 0.00474 | 0.06365 | 0.05443 |
