# Supplementary material for: Molecular signatures of neurodegeneration in the cortex of PS1/PS2 double knockout mice
Source: Springer Nature journal article supplement (doi:10.1186/1750-1326-3-14), 2008-01-01
Supplement: Additional file 4 [file 1750-1326-3-14-s4.pdf]

Table 2. FC

**TABLE 2. Expression differences between PS1PS2KO and CNT in the FRONTAL CORTEX (>50%, p<0.05)**

| Probe Set    | Gene Title                                            | Symbol    | Unigene      | NCBI ID   | ALR all | ALR HC | ALR FC | pVal ALL | PrPval HC | PrPval FC |
|--------------|-------------------------------------------------------|-----------|--------------|-----------|---------|--------|--------|----------|-----------|-----------|
| 1417851_at   | chemokine (C-X-C motif) ligand 13                     | Cxcl13    | Mm.10116.1   | AF030636  | 2.31    | 2.02   | 2.59   | 0.00452  | 0.13134   | 0.02250   |
| 1419202_at   | cystatin F (leukocystatin)                            | Cstf7     | Mm.12965.1   | NM_009977 | 1.97    | 1.41   | 2.53   | 0.00143  | 0.08791   | 0.00992   |
| 1417266_at   | chemokine (C-C motif) ligand 6                        | Ccl6      | Mm.137.1     | BC002073  | 1.58    | 1.23   | 1.92   | 0.00025  | 0.04007   | 0.00373   |
| 1420699_at   | C-type lectin domain family 7, member a               | Clec7a    | Mm.132943.1  | NM_020008 | 1.47    | 1.20   | 1.75   | 0.00100  | 0.06092   | 0.01402   |
| 1426509_s_at | glial fibrillary acidic protein                       | Gfap      | Mm.1239.1    | BB183081  | 1.43    | 1.13   | 1.73   | 0.00124  | 0.04247   | 0.02356   |
| 1426508_at   | glial fibrillary acidic protein                       | Gfap      | Mm.1239.1    | BB183081  | 1.32    | 0.98   | 1.67   | 0.00260  | 0.05941   | 0.03135   |
| 1418021_at   | complement component 4B                               | C4b       | Mm.16106.1   | NM_009780 | 1.34    | 1.07   | 1.61   | 0.00507  | 0.11087   | 0.03941   |
| 1448859_at   | chemokine (C-X-C motif) ligand 13                     | Cxcl13    | Mm.10116.1   | AF030636  | 1.32    | 1.07   | 1.56   | 0.00426  | 0.13192   | 0.02315   |
| 1450792_at   | TYRO protein tyrosine kinase binding protein          | Tyrobp    | Mm.46301.1   | NM_011662 | 1.34    | 1.13   | 1.56   | 0.00088  | 0.06521   | 0.01056   |
| 1436996_x_at | lysozyme                                              | Lyz       | Mm.45436.2   | AV066625  | 1.16    | 0.79   | 1.54   | 0.00803  | 0.15150   | 0.03980   |
| 1423547_at   | lysozyme                                              | Lyzs      | Mm.45436.1   | AW208566  | 1.11    | 0.71   | 1.51   | 0.00851  | 0.12182   | 0.04666   |
| 1419128_at   | integrin alpha X                                      | Itgax     | Mm.22378.1   | NM_021334 | 1.00    | 0.57   | 1.43   | 0.00244  | 0.12644   | 0.00716   |
| 1439426_x_at | lysozyme                                              | Lyz       | Mm.45436.3   | AV058500  | 1.06    | 0.74   | 1.37   | 0.00311  | 0.07813   | 0.02788   |
| 1452417_x_at | immunoglobulin kappa chain, constant region           | Igk-C     | Mm.104747.14 | AV057155  | 0.84    | 0.38   | 1.30   | 0.11118  | 0.67283   | 0.04517   |
| 1417381_at   | complement component 1, q subcomponent, alpha         | C1qa      | Mm.370.1     | NM_007572 | 1.11    | 0.94   | 1.28   | 0.00180  | 0.09314   | 0.01369   |
| 1449911_at   | lymphocyte-activation gene 3                          | Lag3      | Mm.4528.1    | NM_008479 | 0.91    | 0.59   | 1.24   | 0.00267  | 0.12388   | 0.01152   |
| 1449164_at   | CD68 antigen                                          | Cd68      | Mm.15819.1   | BC021637  | 1.03    | 0.85   | 1.22   | 0.00342  | 0.09923   | 0.02970   |
| 1425519_a_at | CD74 antigen (invariant polypeptide of MHC class II)  | Cd74      | Mm.7043.1    | BC003476  | 0.95    | 0.69   | 1.21   | 0.00850  | 0.16952   | 0.03817   |
| 1421792_s_at | triggering receptor expressed on myeloid cells 2      | Trem2     | Mm.195828.1  | NM_031254 | 0.93    | 0.66   | 1.20   | 0.00288  | 0.12005   | 0.01573   |
| 1460218_at   | CD52 antigen                                          | Cd52      | Mm.24130.1   | NM_013706 | 0.99    | 0.81   | 1.16   | 0.00108  | 0.07929   | 0.00912   |
| 1422903_at   | lymphocyte antigen 86                                 | Ly86      | Mm.2639.1    | NM_010745 | 0.87    | 0.60   | 1.13   | 0.00215  | 0.09559   | 0.01465   |
| 1417063_at   | complement component 1, q subcomponent, beta          | C1qb      | Mm.2570.1    | NM_009777 | 0.97    | 0.84   | 1.10   | 0.00297  | 0.10032   | 0.02402   |
| 1449401_at   | complement component 1, q subcomponent, C             | C1qc      | Mm.3453.1    | NM_007574 | 0.93    | 0.79   | 1.07   | 0.00185  | 0.07523   | 0.02206   |
| 1433935_at   | expressed sequence AU020206                           | AU020206  | Mm.200422.1  | BI151331  | 0.90    | 0.74   | 1.05   | 0.00219  | 0.06900   | 0.02895   |
| 1435290_x_at | histocompatibility 2, class II antigen A, alpha       | H2-Aa     | Mm.175310.2  | BE688749  | 0.78    | 0.54   | 1.01   | 0.02613  | 0.33849   | 0.03616   |
| 1427076_at   | macrophage expressed gene 1                           | Mpeg1     | Mm.3999.1    | L20315    | 0.93    | 0.85   | 1.01   | 0.00038  | 0.03121   | 0.01347   |
| 1428114_at   | solute carrier family 14 (urea transporter), member 1 | Scl14a1   | Mm.33832.1   | AV556396  | 0.71    | 0.44   | 0.98   | 0.00222  | 0.08049   | 0.01390   |
| 1437726_x_at | complement component 1, q subcomponent, beta          | C1qb      | Mm.2570.3    | BB111335  | 0.96    | 0.94   | 0.98   | 0.00025  | 0.02432   | 0.01219   |
| 1419483_at   | complement component 3a receptor 1                    | C3ar1     | Mm.2408.1    | NM_009779 | 0.82    | 0.66   | 0.98   | 0.00251  | 0.05516   | 0.03805   |
| 1454268_a_at | cytochrome b-245, alpha polypeptide                   | Cyba      | Mm.448.2     | AK018713  | 0.70    | 0.43   | 0.96   | 0.00208  | 0.06983   | 0.01453   |
| 1416714_at   | interferon regulatory factor 8                        | Irf8      | Mm.3182.1    | BG069095  | 0.69    | 0.44   | 0.94   | 0.00365  | 0.10040   | 0.02244   |
| 1452968_at   | collagen triple helix repeat containing 1             | Cthrc1    | Mm.41556.1   | AK003674  | 0.96    | 1.00   | 0.92   | 0.00030  | 0.02034   | 0.04006   |
| 1417870_x_at | cathepsin Z                                           | Ctsz      | Mm.156919.1  | NM_022325 | 0.81    | 0.70   | 0.92   | 0.00369  | 0.11343   | 0.02486   |
| 1419482_at   | complement component 3a receptor 1                    | C3ar1     | Mm.2408.1    | NM_009779 | 0.60    | 0.28   | 0.91   | 0.02177  | 0.34027   | 0.03940   |
| 1417868_a_at | cathepsin Z                                           | Ctsz      | Mm.156919.1  | NM_022325 | 0.86    | 0.81   | 0.90   | 0.00256  | 0.08309   | 0.02592   |
| 1448591_at   | cathepsin S                                           | Ctss      | Mm.3619.1    | NM_021281 | 0.70    | 0.50   | 0.90   | 0.00214  | 0.12149   | 0.00945   |
| 1416382_at   | cathepsin C                                           | Ctsc      | Mm.684.1     | NM_009982 | 0.73    | 0.56   | 0.90   | 0.00157  | 0.05315   | 0.02338   |
| 1419132_at   | toll-like receptor 2                                  | Tlr2      | Mm.87596.1   | NM_011905 | 0.65    | 0.42   | 0.89   | 0.00867  | 0.11926   | 0.04823   |
| 1451780_at   | B-cell linker                                         | Blink     | Mm.9749.1    | AF068182  | 0.85    | 0.81   | 0.89   | 0.00379  | 0.08357   | 0.04229   |
| 1416066_at   | CD9 antigen                                           | Cd9       | Mm.2956.1    | NM_007657 | 0.77    | 0.67   | 0.87   | 0.00160  | 0.06631   | 0.02275   |
| 1419004_s_at | B-cell leukemia/lymphoma 2 related protein A1         | Bcl2a1    | Mm.196731.1  | L16462    | 0.65    | 0.45   | 0.86   | 0.00561  | 0.08845   | 0.04303   |
| 1418340_at   | Fc receptor, IgE, high affinity I, gamma polypeptide  | Fcer1g    | Mm.22673.1   | NM_010185 | 0.65    | 0.47   | 0.82   | 0.00215  | 0.07978   | 0.02018   |
| 1450678_at   | integrin beta 2                                       | Itgb2     | Mm.1137.1    | NM_008404 | 0.63    | 0.44   | 0.82   | 0.00512  | 0.13998   | 0.02652   |
| 1417268_at   | CD14 antigen                                          | Cd14      | Mm.3460.1    | NM_009841 | 0.61    | 0.40   | 0.81   | 0.00008  | 0.01818   | 0.00027   |
| 1420361_at   | solute carrier family 11, member 1                    | Scl11a1   | Mm.2913.1    | NM_013612 | 0.57    | 0.37   | 0.78   | 0.01729  | 0.27064   | 0.04271   |
| 1434366_x_at | complement component 1, q subcomponent, beta          | C1qb      | Mm.2570.2    | AW227993  | 0.69    | 0.60   | 0.78   | 0.00113  | 0.03548   | 0.03044   |
| 1417869_s_at | cathepsin Z                                           | Ctsz      | Mm.156919.1  | NM_022325 | 0.70    | 0.64   | 0.76   | 0.00157  | 0.04719   | 0.03422   |
| 1437874_s_at | hexosaminidase B                                      | Hexb      | Mm.219675.2  | AV225808  | 0.67    | 0.58   | 0.75   | 0.00171  | 0.07442   | 0.02038   |
| 1436905_x_at | lysosomal-associated protein transmembrane 5          | Laptm5    | Mm.4554.2    | BB218107  | 0.71    | 0.69   | 0.73   | 0.00014  | 0.01123   | 0.01530   |
| 1448749_at   | pleckstrin                                            | Plek      | Mm.98232.1   | AF181829  | 0.57    | 0.41   | 0.73   | 0.00900  | 0.22278   | 0.02126   |
| 1420249_s_at | chemokine (C-C motif) ligand 6                        | Ccl6      | Mm.218266.1  | AV084904  | 0.48    | 0.25   | 0.72   | 0.01080  | 0.13946   | 0.03907   |
| 1417346_at   | PYD and CARD domain containing                        | Pycard    | Mm.24163.1   | BG084230  | 0.54    | 0.37   | 0.71   | 0.00328  | 0.07192   | 0.03006   |
| 1418365_at   | cathepsin H                                           | Ctsh      | Mm.2277.1    | NM_007801 | 0.61    | 0.52   | 0.71   | 0.00174  | 0.02609   | 0.04492   |
| 1448620_at   | Fc receptor, IgG, low affinity III                    | Fcgr3     | Mm.22119.1   | NM_010188 | 0.58    | 0.47   | 0.69   | 0.00394  | 0.08562   | 0.04041   |
| 1448118_a_at | cathepsin D                                           | Cttd      | Mm.2147.1    | NM_009983 | 0.64    | 0.60   | 0.69   | 0.00147  | 0.05952   | 0.02417   |
| 1435999_at   | serine peptidase inhibitor, Kazal type 8              | Spink8    | Mm.99613.1   | BB284475  | 0.39    | 0.10   | 0.67   | 0.19053  | 0.85508   | 0.02674   |
| 1419100_at   | serine (or cysteine) peptidase inhibitor, clade A, 3N | Serpina3n | Mm.22650.1   | NM_009252 | 0.51    | 0.36   | 0.67   | 0.00303  | 0.02803   | 0.04000   |
| 1438629_x_at | granulin                                              | Grn       | Mm.1568.2    | AV166504  | 0.54    | 0.42   | 0.66   | 0.00034  | 0.02322   | 0.01058   |
| 1423909_at   | transmembrane protein 176A                            | Tmem176a  | Mm.27061.1   | BC010831  | 0.52    | 0.38   | 0.65   | 0.00388  | 0.10302   | 0.02962   |
| 1417523_at   | pleckstrin                                            | Plek      | Mm.98232.1   | AF181829  | 0.37    | 0.09   | 0.65   | 0.03232  | 0.68526   | 0.00739   |
| 1428018_a_at | Cd300D antigen                                        | Cd300d    | Mm.2699.2    | AF251705  | 0.44    | 0.24   | 0.63   | 0.00332  | 0.12129   | 0.01157   |
| 1416121_at   | lysyl oxidase                                         | Lox       | Mm.172.1     | M65143    | 0.32    | 0.03   | 0.62   | 0.05209  | 0.80142   | 0.03354   |
| 1452014_a_at | insulin-like growth factor 1                          | Igf1      | Mm.2770.2    | AF440694  | 0.36    | 0.11   | 0.62   | 0.01925  | 0.24103   | 0.02914   |
| 1448380_at   | lectin, galactoside-binding, soluble 3 binding        | Lgals3bp  | Mm.3152.1    | NM_011150 | 0.44    | 0.28   | 0.61   | 0.00906  | 0.11928   | 0.04887   |
| 1421375_a_at | S100 calcium binding protein A6 (calcylin)            | S100a6    | Mm.100144.1  | NM_011313 | 0.57    | 0.53   | 0.60   | 0.00036  | 0.02383   | 0.01769   |
| 1450355_a_at | capping protein (actin filament), gelsolin-like       | Capg      | Mm.18626.1   | NM_007599 | 0.41    | 0.22   | 0.60   | 0.01610  | 0.32483   | 0.02581   |
| 1448617_at   | CD53 antigen                                          | Cd53      | Mm.2692.1    | NM_007651 | 0.51    | 0.42   | 0.60   | 0.00193  | 0.08527   | 0.01867   |
| 1425545_x_at | histocompatibility 2, D region locus 1                | H2-D1     | Mm.33263.2   | M86502    | 0.50    | 0.40   | 0.60   | 0.01362  | 0.25177   | 0.01935   |
| 1448452_at   | interferon regulatory factor 8                        | Irf8      | Mm.3182.1    | BG069095  | 0.50    | 0.40   | 0.60   | 0.00319  | 0.06613   | 0.04074   |
| 1448148_at   | granulin                                              | Grn       | Mm.1568.1    | M86736    | 0.53    | 0.46   | 0.59   | 0.00032  | 0.01122   | 0.02192   |
| 1418610_at   | solute carrier family 17, member 6                    | Scl17a6   | Mm.70945.1   | NM_080853 | -0.68   | -0.78  | -0.59  | 0.00014  | 0.01017   | 0.01269   |
| 1440464_at   | ELAV (embryonic lethal, abnormal vision)-like 1       | Elavl1    | Mm.127901.1  | BB284404  | -0.83   | -0.95  | -0.72  | 0.05498  | 0.32224   | 0.02987   |
| 1439332_at   | DNA-damage-inducible transcript 4-like                | Ddit4l    | Mm.195809.2  | AV251625  | -0.50   | -0.21  | -0.78  | 0.00511  | 0.27400   | 0.00263   |
