# Supplementary material for: Molecular signatures of neurodegeneration in the cortex of PS1/PS2 double knockout mice
Source: Springer Nature journal article supplement (doi:10.1186/1750-1326-3-14), 2008-01-01
Supplement: Additional file 5 [file 1750-1326-3-14-s5.pdf]

**TABLE 3. Expression differences between PS1PS2KO and CNT in the HIPPOCAMPUS (>50%, p<0.05)**

| Probe Set    | Gene Title                                             | Symbol      | Unigene     | NCBI ID   | ALR all | ALR HC | ALR FC | pVal ALL | PrPval HC | PrPval FC |
|--------------|--------------------------------------------------------|-------------|-------------|-----------|---------|--------|--------|----------|-----------|-----------|
| 1454866_s_at | chloride intracellular channel 6                       | Clc6c       | Mm.44747.1  | BC176424  | 1.49    | 3.03   | -0.06  | 0.09138  | 0.01047   | 0.84647   |
| 1460049_s_at | RIKEN cDNA 1500015O10 gene                             | 1500015O10R | Mm.213028.1 | BB392676  | 1.24    | 2.32   | 0.16   | 0.07481  | 0.02017   | 0.77927   |
| 1438200_at   | sulfatase 1                                            | Sulf1       | Mm.45563.1  | BB065799  | 0.75    | 1.24   | 0.26   | 0.02865  | 0.01863   | 0.28295   |
| 1417266_at   | chemokine (C-C motif) ligand 6                         | Ccl6f       | Mm.137.1    | BC002073  | 1.58    | 1.23   | 1.92   | 0.00025  | 0.04007   | 0.00373   |
| 1426509_s_at | glial fibrillary acidic protein                        | Gfap        | Mm.1239.1   | BB183081  | 1.43    | 1.13   | 1.73   | 0.00124  | 0.04247   | 0.02356   |
| 1440807_at   | Membrane associated guanylate kinase 2                 | Mag2        | Mm.132480.1 | BB337886  | 0.86    | 1.05   | 0.66   | 0.03780  | 0.02008   | 0.40748   |
| 1429135_at   | RIKEN cDNA 1110059M19 gene                             | 1110059M19R | Mm.23496.1  | AV015858  | 0.69    | 1.03   | 0.34   | 0.02029  | 0.03778   | 0.25963   |
| 1429846_at   | RIKEN cDNA 933041K21 gene                              | 933041K21R  | Mm.102489.1 | BM250766  | 0.89    | 1.03   | 0.76   | 0.03484  | 0.02051   | 0.15335   |
| 1452968_at   | collagen triple helix repeat containing 1              | Ctrc1c1     | Mm.41556.1  | AK038744  | 0.96    | 1.00   | 0.92   | 0.00030  | 0.02034   | 0.04006   |
| 1437726_x_at | complement component 1, q subcomponent, beta           | C1qb        | Mm.2570.3   | BB111335  | 0.96    | 0.94   | 0.98   | 0.00025  | 0.02432   | 0.01219   |
| 1437060_at   | olfactomedin 4                                         | Olfm4       | Mm.26456.1  | AV290148  | 0.47    | 0.94   | -0.01  | 0.11200  | 0.04006   | 0.95601   |
| 1445555_at   | transient receptor potential cation channel M3         | Trpm3       | Mm.48730.1  | AW125244  | 0.52    | 0.93   | 0.10   | 0.04566  | 0.02090   | 0.51958   |
| 1443770_x_at | ---                                                    | BB026407    | Mm.127920.1 | BB026407  | 0.45    | 0.91   | 0.00   | 0.11684  | 0.03607   | 0.99130   |
| 1446772_at   | ---                                                    | BB453864    | Mm.215970.1 | BB453864  | 0.67    | 0.87   | 0.47   | 0.00352  | 0.01143   | 0.12967   |
| 1456923_at   | transient receptor potential cation channel M3         | Trpm3       | Mm.127343.1 | BB377721  | 0.27    | 0.87   | -0.33  | 0.40039  | 0.01051   | 0.29035   |
| 1427076_at   | macrophage expressed gene 1                            | Mpeg1       | Mm.3999.1   | L20315    | 0.93    | 0.85   | 1.01   | 0.00038  | 0.03121   | 0.01347   |
| 1415894_at   | ectonucleotide phosphodiesterase 2                     | Enpp2       | Mm.28107.1  | BC003264  | 0.42    | 0.84   | 0.01   | 0.06130  | 0.04547   | 0.90588   |
| 1423400_at   | klf8                                                   | Klf8        | Mm.6390.1   | BC175355  | 0.54    | 0.75   | 0.33   | 0.03760  | 0.04044   | 0.48811   |
| 1441102_at   | prolactin receptor                                     | Prlr        | Mm.33737.1  | BB428201  | 0.37    | 0.75   | 0.01   | 0.03867  | 0.02066   | 0.94457   |
| 1456440_s_at | ST8 alpha-N-acetylneuraminidase 2, 8-sialyltransferase | St8sia6     | Mm.24267.2  | AV375081  | 0.63    | 0.72   | 0.53   | 0.02041  | 0.00816   | 0.31737   |
| 1428485_at   | carbonic anhydrase 12                                  | Car12       | Mm.21397.1  | AK009873  | 0.29    | 0.71   | -0.13  | 0.12441  | 0.01155   | 0.34749   |
| 1436905_x_at | lysosomal-associated protein transmembrane 5           | Laptm5      | Mm.4554.2   | BB218107  | 0.71    | 0.69   | 0.73   | 0.00014  | 0.01123   | 0.01530   |
| 1441679_at   | ---                                                    | BB126796    | Mm.213317.1 | BB126796  | 0.34    | 0.67   | 0.00   | 0.13751  | 0.03044   | 0.98642   |
| 1454653_at   | copine family member IX                                | Cpne9       | Mm.65597.1  | BB274531  | 0.14    | 0.66   | -0.38  | 0.62151  | 0.01389   | 0.25710   |
| 1456633_at   | transient receptor potential cation channel M3         | Trpm3       | Mm.131943.1 | BB313276  | 0.30    | 0.65   | -0.04  | 0.12272  | 0.01229   | 0.78653   |
| 1424684_at   | RAB5c, member RAS oncogene family                      | Rab5c       | Mm.29829.1  | BC023027  | 0.29    | 0.64   | -0.05  | 0.09196  | 0.03337   | 0.62671   |
| 1417869_s_at | cathepsin Z                                            | Ctsz        | Mm.196919.1 | NM_022325 | 0.70    | 0.64   | 0.76   | 0.00157  | 0.04719   | 0.03422   |
| 1448536_at   | prolactin receptor                                     | Prlr        | Mm.33737.1  | BC035555  | 0.33    | 0.63   | 0.50   | 0.03323  | 0.04041   | 0.60271   |
| 1434719_at   | alpha-2-macroglobulin                                  | A2m         | Mm.30151.1  | BB185854  | 0.57    | 0.63   | 0.50   | 0.00029  | 0.00158   | 0.05596   |
| 1420720_at   | neuronal pentraxin 2                                   | Npt2        | Mm.10099.1  | NM_016789 | 0.38    | 0.62   | 0.14   | 0.02269  | 0.03879   | 0.31888   |
| 1433734_at   | solute carrier family 13, member 4                     | Slc13a4     | Mm.23666.1  | BB192951  | 0.25    | 0.62   | -0.12  | 0.20677  | 0.01648   | 0.14206   |
| 1456435_at   | MORN repeat containing 1                               | Morn1       | Mm.19009.1  | AI425983  | 0.49    | 0.61   | 0.37   | 0.00509  | 0.01983   | 0.17704   |
| 1422124_a_at | protein tyrosine phosphatase, receptor type, C         | Ptprc       | Mm.143846.1 | NM_011210 | 0.71    | 0.61   | 0.81   | 0.00493  | 0.04972   | 0.07405   |
| 1438643_at   | Calcium/calmodulin-dependent protein kinase ID         | Camk1d      | Mm.133375.1 | BB230839  | 0.32    | 0.61   | 0.04   | 0.07724  | 0.01478   | 0.81078   |
| 1418047_at   | neurogenic differentiation 6                           | Neurod6     | Mm.5106.1   | NM_009717 | 0.32    | 0.60   | 0.03   | 0.04949  | 0.03655   | 0.76196   |
| 1434366_x_at | complement component 1, q subcomponent, beta           | C1qb        | Mm.2570.2   | AW227993  | 0.69    | 0.60   | 0.78   | 0.00113  | 0.03548   | 0.03044   |
| 1439026_at   | transient receptor potential cation channel M3         | Trpm3       | Mm.92048.1  | BB125842  | 0.44    | 0.59   | 0.29   | 0.00474  | 0.00756   | 0.15212   |
| 1459378_at   | glutamate receptor ionotropic, NMDA3A                  | Gria3a      | Mm.132574.1 | AV328567  | -0.32   | 0.59   | -0.05  | 0.04855  | 0.00182   | 0.48771   |
| 1431684_at   | RIKEN cDNA 433241G12 gene                              | 433241G12R  | Mm.18284.1  | AK016624  | 0.41    | 0.59   | 0.20   | 0.01218  | 0.00823   | 0.08238   |
| 1426115_a_at | potassium inwardly-rectifying channel, subfamily J9    | Kcnj9       | Mm.4278.2   | AF130860  | -0.45   | 0.59   | -0.30  | 0.00300  | 0.03806   | 0.02622   |
| 1416702_at   | serine peptidase-inhibitor, clade I, member 1          | Serpin1     | Mm.41560.1  | NM_009250 | -0.31   | 0.59   | -0.04  | 0.04944  | 0.04801   | 0.70819   |
| 1444020_at   | neuracan                                               | Ncan        | Mm.156790.1 | BM939365  | -0.40   | 0.59   | -0.20  | 0.01182  | 0.03530   | 0.02830   |
| 1431064_at   | dipeptidylpeptidase 8                                  | Dpp8        | Mm.202749.1 | BF119821  | -0.36   | 0.59   | -0.14  | 0.02217  | 0.00553   | 0.25898   |
| 1458518_at   | cytoplasmic polyadenylation element binding 2          | Cpeb2       | Mm.151602.1 | BM935843  | -0.40   | 0.60   | -0.20  | 0.02995  | 0.01552   | 0.43622   |
| 1444139_at   | DNA-damage-inducible transcript 4-like                 | Ddit4l      | Mm.205420.1 | BG797099  | -0.68   | 0.60   | -0.76  | 0.00392  | 0.03772   | 0.10333   |
| 1431229_at   | imprinted gene in the Prader-Willi syndrome region     | Ipw         | Mm.220871.1 | AK019361  | -0.42   | 0.60   | -0.23  | 0.01346  | 0.00086   | 0.29805   |
| 1440390_at   | cDNA sequence BC025575                                 | BC025575    | Mm.100100.1 | BE980997  | -0.39   | 0.61   | -0.17  | 0.01278  | 0.00756   | 0.05277   |
| 1456683_at   | SARF-1b, transcription modulator                       | Slrm        | Mm.80900.1  | BM200011  | -0.55   | 0.61   | -0.49  | 0.00364  | 0.01682   | 0.15306   |
| 1428376_at   | RIKEN cDNA 433241G12 gene                              | 433241G12R  | Mm.18284.1  | AK016624  | 0.41    | 0.61   | 0.20   | 0.01218  | 0.00823   | 0.08238   |
| 1438205_at   | RIKEN cDNA 1110014N23R gene                            | 1110014N23R | Mm.29451.2  | BE892418  | -0.37   | 0.61   | -0.12  | 0.02899  | 0.01992   | 0.24460   |
| 1456304_at   | gene model 996, (NCBI)                                 | Gm996       | Mm.44116.1  | BF463551  | -0.40   | 0.62   | -0.18  | 0.02139  | 0.04583   | 0.11569   |
| 1422331_at   | POU domain, class 3, transcription factor 3            | Pou3f3      | Mm.56944.1  | NM_008900 | -0.39   | 0.62   | -0.17  | 0.00419  | 0.00322   | 0.21468   |
| 1435615_at   | zinc finger protein 365                                | Zfp365      | Mm.39548.2  | BB277790  | -0.38   | 0.63   | -0.13  | 0.02403  | 0.00430   | 0.24051   |
| 1447207_at   | z/yq-1l homolog B (C. elegans)                         | Zyp11b      | Mm.219003.1 | BE946949  | -0.49   | 0.63   | -0.35  | 0.00965  | 0.04375   | 0.20127   |
| 1429684_at   | RIKEN cDNA 5830472M02 gene                             | 5830472M02R | Mm.89828.1  | BG094398  | -0.46   | 0.63   | -0.29  | 0.00869  | 0.04559   | 0.12443   |
| 1431216_s_at | DnaJ (Hsp40) homolog, subfamily C, member 6            | Dnajc6      | Mm.181754.1 | BI730538  | -0.41   | 0.63   | -0.18  | 0.01572  | 0.00585   | 0.23669   |
| 1429696_at   | G protein-coupled receptor 123                         | Gpr123      | Mm.39863.1  | BE946247  | -0.46   | 0.63   | -0.29  | 0.00763  | 0.00177   | 0.02047   |
| 1434885_at   | SPT2, suppressor of Ty, domain containing 1            | Spt2d1      | Mm.24055.1  | BA224254  | -0.34   | 0.63   | -0.05  | 0.03942  | 0.03896   | 0.81331   |
| 1434805_at   | dapper homolog 3, antagonist of beta-catenin           | Dm3         | Mm.18284.1  | AK016624  | 0.41    | 0.63   | 0.20   | 0.01218  | 0.00823   | 0.08238   |
| 1431465_s_at | lory-2w-three domain containing 1                      | Fyttl1      | Mm.195995.1 | AK008130  | -0.48   | 0.65   | -0.32  | 0.00697  | 0.02416   | 0.17016   |
| 1422949_at   | nitric oxide synthase 1, neuronal                      | Nos1        | Mm.44249.1  | NM_008712 | -0.26   | 0.65   | 0.13   | 0.13029  | 0.01141   | 0.31277   |
| 1459750_s_at | G protein-coupled receptor 123                         | Gpr123      | Mm.195306.1 | AU015577  | -0.49   | 0.65   | -0.33  | 0.01531  | 0.02070   | 0.30183   |
| 1430395_at   | ankyrin repeat domain 45                               | Ankrd45     | Mm.87356.1  | AK016757  | -0.44   | 0.65   | -0.22  | 0.01046  | 0.01552   | 0.10166   |
| 1429187_at   | transmembrane emp24 transport domain 7                 | Tmed7       | Mm.220909.1 | AV306753  | -0.39   | 0.65   | -0.12  | 0.03836  | 0.04615   | 0.14143   |
| 1442099_at   | ubiquitin specific peptidase 31                        | Usp31       | Mm.171183.1 | BM227490  | -0.45   | 0.65   | -0.24  | 0.00728  | 0.00627   | 0.11215   |
| 1427017_at   | special AT-rich sequence binding protein 2             | Satb2       | Mm.73537.1  | BB104560  | -0.51   | 0.66   | -0.35  | 0.00558  | 0.04735   | 0.07620   |
| 1435877_at   | serine/threonine kinase 38 like                        | Sik38l      | Mm.100606.1 | BB476811  | -0.44   | 0.66   | -0.22  | 0.02392  | 0.04908   | 0.27982   |
| 1435385_at   | teashirt zinc finger family member 2                   | Tshz2       | Mm.28740.1  | AV556161  | -0.24   | 0.66   | 0.19   | 0.28054  | 0.02020   | 0.17376   |
| 1443434_s_at | plevin C1                                              | Plevin1     | Mm.182760.1 | AK017262  | -0.52   | 0.66   | -0.27  | 0.00302  | 0.00800   | 0.12769   |
| 1450041_a_at | lubby candidate gene                                   | Luby1       | Mm.4804.1   | NM_021885 | -0.39   | 0.68   | -0.10  | 0.03133  | 0.01312   | 0.62859   |
| 1428052_a_at | zinc finger, MYM domain containing 1                   | Zymf1       | Mm.80623.2  | BC027750  | -0.57   | 0.68   | -0.45  | 0.00393  | 0.04126   | 0.08303   |
| 1435234_at   | nuclear receptor coactivator 2                         | Ncoa2       | Mm.9636.1   | BM234716  | -0.40   | 0.68   | -0.12  | 0.04606  | 0.02359   | 0.52424   |
| 1460025_at   | leucine-rich and immunoglobulin-like domains 2         | Lrig2       | Mm.122660.1 | BB129159  | -0.43   | 0.68   | -0.19  | 0.01336  | 0.00962   | 0.02408   |
| 1422151_at   | opposite strand transcription unit to Stag3            | Gats        | Mm.160250.1 | NM_030719 | -0.45   | 0.68   | -0.21  | 0.01173  | 0.03421   | 0.17128   |
| 1440228_at   | RAN binding protein 6                                  | Ranbp6      | Mm.138234.1 | BB477637  | -0.42   | 0.68   | -0.16  | 0.02612  | 0.02937   | 0.21807   |
| 1453760_at   | mesoderm induction early response 1 homolog            | Mier1       | Mm.100190.1 | BG963598  | -0.40   | 0.69   | -0.11  | 0.03805  | 0.03233   | 0.23409   |
| 1434851_at   | RIKEN cDNA 8430415E04 gene                             | 8430415E04R | Mm.151153.1 | BE980275  | -0.45   | 0.69   | -0.22  | 0.01658  | 0.04884   | 0.03419   |
| 1434112_at   | latrophilin 2                                          | Lphn2       | Mm.30698.1  | BG966339  | -0.40   | 0.69   | -0.11  | 0.02793  | 0.00104   | 0.01476   |
| 1427570_at   | nuclear receptor subfamily 4, group A, member 2        | Nr1h2       | Mm.3507.1   | NM_013136 | -0.47   | 0.69   | -0.23  | 0.01912  | 0.01019   | 0.27450   |
| 1424867_at   | ---                                                    | BQ174216    | Mm.194351.1 | BQ174216  | -0.39   | 0.71   | 0.07   | 0.10367  | 0.03385   | 0.82457   |
| 1429262_a_at | splicing factor 3b, subunit 2                          | Sf3b2       | Mm.196532.1 | BF022081  | -0.40   | 0.71   | -0.09  | 0.05242  | 0.04038   | 0.35578   |
| 1434917_at   | cordons-bleu                                           | Cobl        | Mm.22847.1  | BQ173923  | -0.43   | 0.71   | -0.14  | 0.03121  | 0.02830   | 0.25494   |
| 1447944_at   | zinc finger with KRAB and SCAN domains 1               | Zkscan1     | Mm.25477.2  | BB006473  | -0.53   | 0.71   | -0.35  | 0.00603  | 0.04890   | 0.06630   |
| 1454950_at   | RIKEN cDNA B930006L02 gene                             | B930006L02R | Mm.148313.1 | BB699417  | -0.44   | 0.71   | -0.16  | 0.02910  | 0.02641   | 0.29703   |
| 1423287_at   | cerebellin 1 precursor protein                         | Cbln1       | Mm.4880.1   | AA016422  | -0.38   | 0.71   |        |          |           |           |
