# Supplementary figures and images for: Molecular signatures of neurodegeneration in the cortex of PS1/PS2 double knockout mice
Source: Springer Nature journal article supplement (doi:10.1186/1750-1326-3-14), 2008-01-01

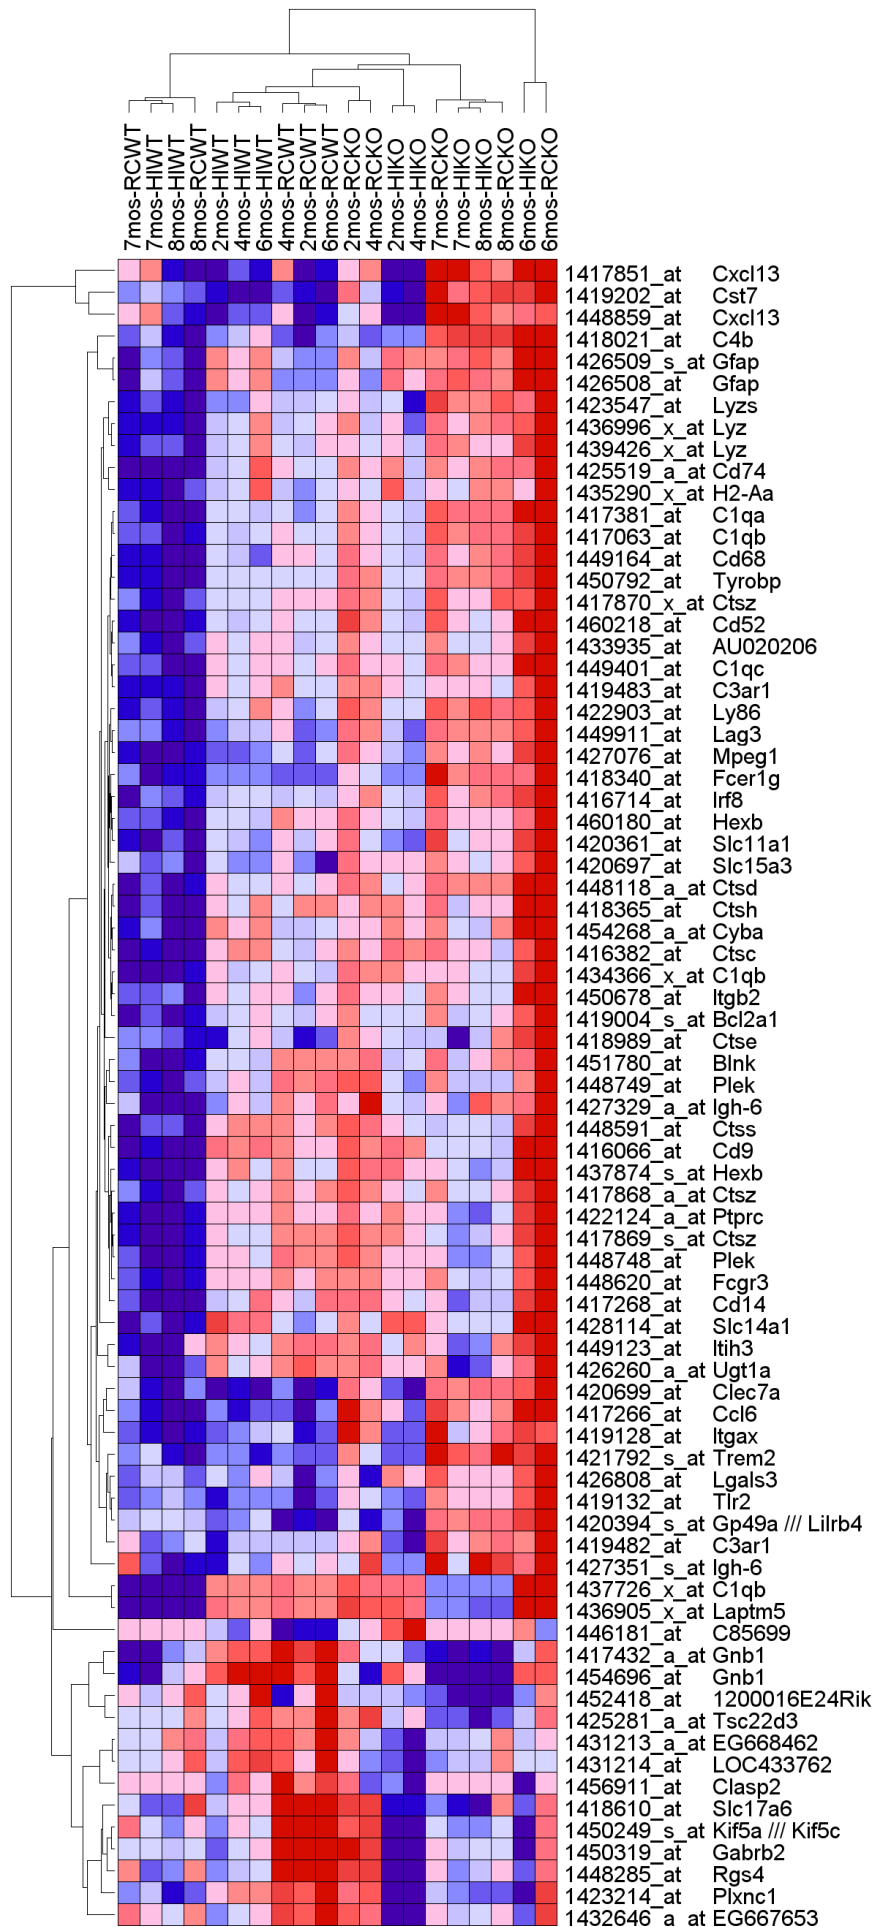

Supplement: Additional file 2 [file 1750-1326-3-14-s2.pdf]

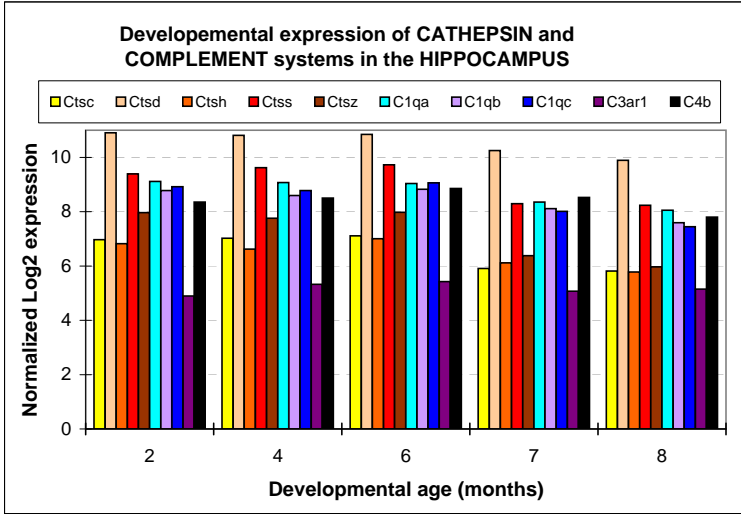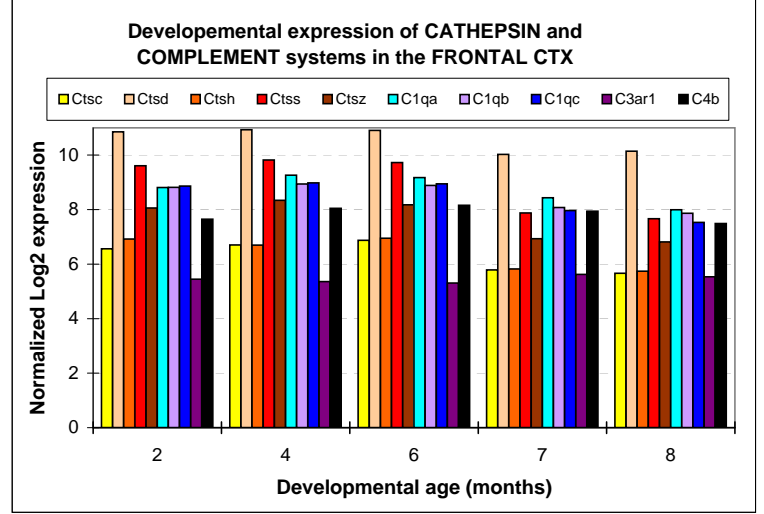

Supplement: Additional file 6 [file 1750-1326-3-14-s6.pdf]
